# Supplementary material for: Solid-state nitrogen-doped carbon nanoparticles with tunable emission prepared by a microwave-assisted method
Source: Royal Society of Chemistry journal article supplement (doi:10.1039/d1ra07290k), 2021-01-01

Electronic Supplementary Information

## **Solid-state Nitrogen-doped Carbon Nanoparticles with Tunable Emission Prepared by Microwave-assisted Method**

Fitri A. Permatasari<sup>a</sup>, Fitriyanti Nakul<sup>b</sup>, Tirta Rona Mayangsari<sup>c</sup>, Akfiny Hasdi Aimon<sup>a</sup>, Bebeh Wahid Nuryadin<sup>d</sup>, Satria Zulkarnaen Bisri<sup>e</sup> and Takashi Ogi<sup>f</sup> and Ferry Iskandar<sup>\*,a, g</sup>

- a) Department of Physics, Faculty of Mathematics and Natural Sciences, Institut Teknologi Bandung, Jalan Ganesha 10, Bandung, West Java, Indonesia 40132.
- b) Department of Electrical Engineering, Politeknik Negeri Batam, Batam, Indonesia.
- c) Department of Chemistry, Universitas Pertamina, Jakarta 12220, Indonesia
- d) Department of Physics, Faculty of Science and Technology, UIN Sunan Gunung Djati Bandung, Jl. A. H. Nasution 105 Bandung Indonesia 40614
- e) RIKEN Center of Emergent Matter Science, 2-1 Hirosawa, Wako, Saitama 351-0198, Japan.
- f) Chemical Engineering Program, Department of Advanced Science and Engineering, Graduate School of Advanced Science and Engineering, Hiroshima University, 1-4-1 Kagamiyama, Higashihiroshima 739-8527, Japan
- g) Research Center for Nanoscience and Nanotechnology, Institut Teknologi Bandung, Jalan Ganesha 10 Bandung, Indonesia 40132. ferry@fi.itb.ac.id

**Figure S1.** Designed microwave apparatus with the infrared thermometer for synthesis the CNP sample.

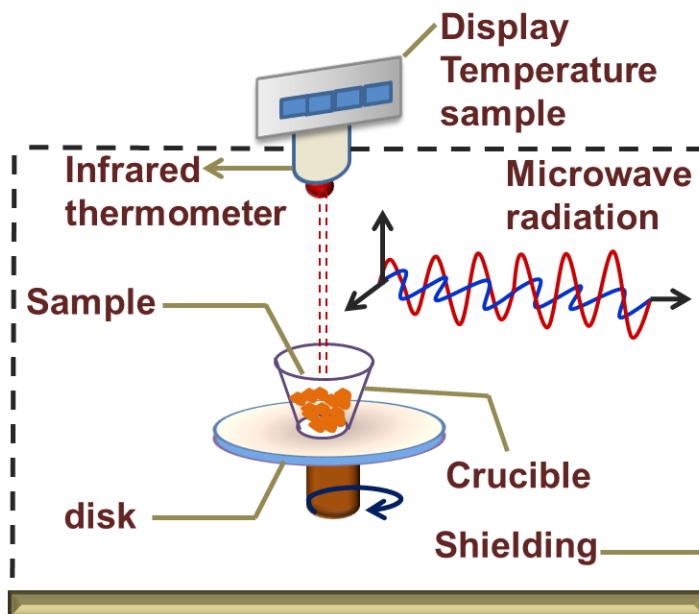

**Figure S2.** Calibration curve the infrared thermometer that used in synthesis compared to the thermocouple.

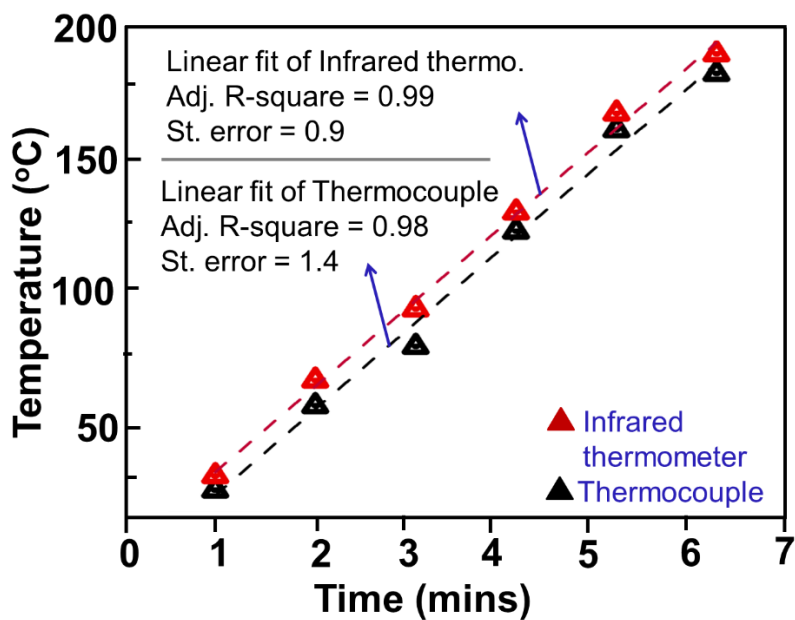

**Figure S3.** Digital Photograph of the CNP samples in varying molar ratios.

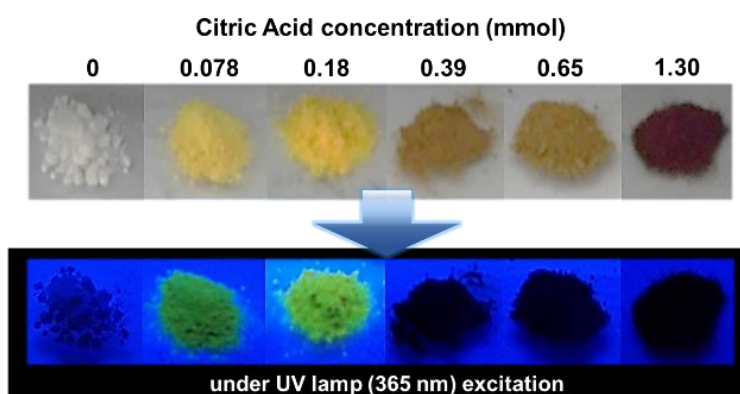

**Figure S4.** PL emission spectra of the CNP samples in varying molar ratios.

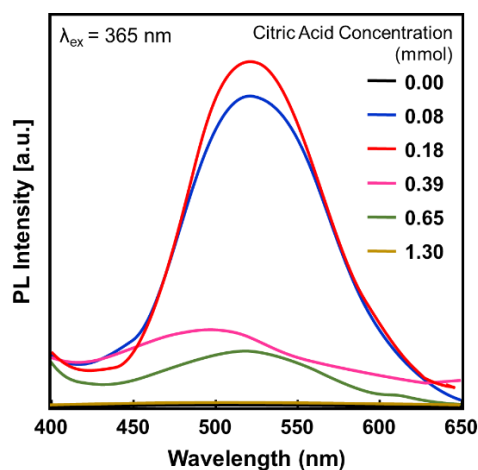

**Figure S5.** UV-Vis Absorption spectra of the CNP models in varying nitrogen concentration.

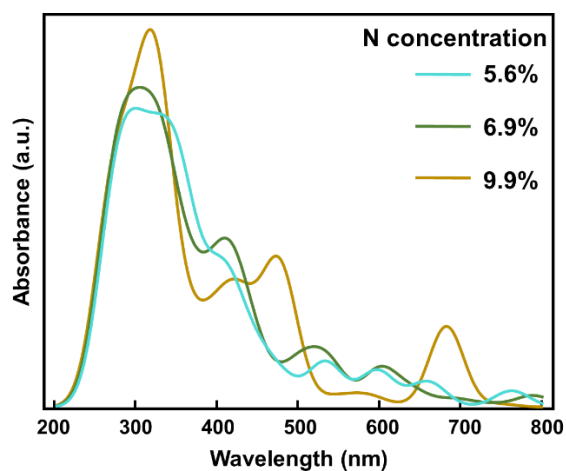

Supplement: d1ra07290k1.pdf [file d1ra07290k1.pdf]
